# Supplementary material for: Selective inhibition of JAK3 signaling is sufficient to reverse alopecia areata
Source: PubMed Central journal article supplement (PMC8119218; doi:10.1172/jci.insight.142205), 2021-04-08
Supplement: jciinsight-6-142205-s270.pdf [file jciinsight-6-142205-s270.pdf]

## **SUPPLEMENTARY MATERIAL**

### **Selective inhibition of JAK3 signaling is sufficient to reverse alopecia areata**

Zhenpeng Dai<sup>1</sup>, James Chen<sup>1</sup>, Yuqian Chang<sup>1</sup>, and Angela M. Christiano<sup>1,2</sup>

**Affiliations:**

<sup>1</sup> Department of Dermatology, Columbia University, Vagelos College of Physicians & Surgeons, New York, NY, 10032, USA

<sup>2</sup> Department of Genetics & Development, Columbia University, Vagelos College of Physicians & Surgeons, New York, NY, 10032, USA

\*Corresponding author Dr. Angela M. Christiano; Email: [amc65@cumc.columbia.edu](mailto:amc65@cumc.columbia.edu).

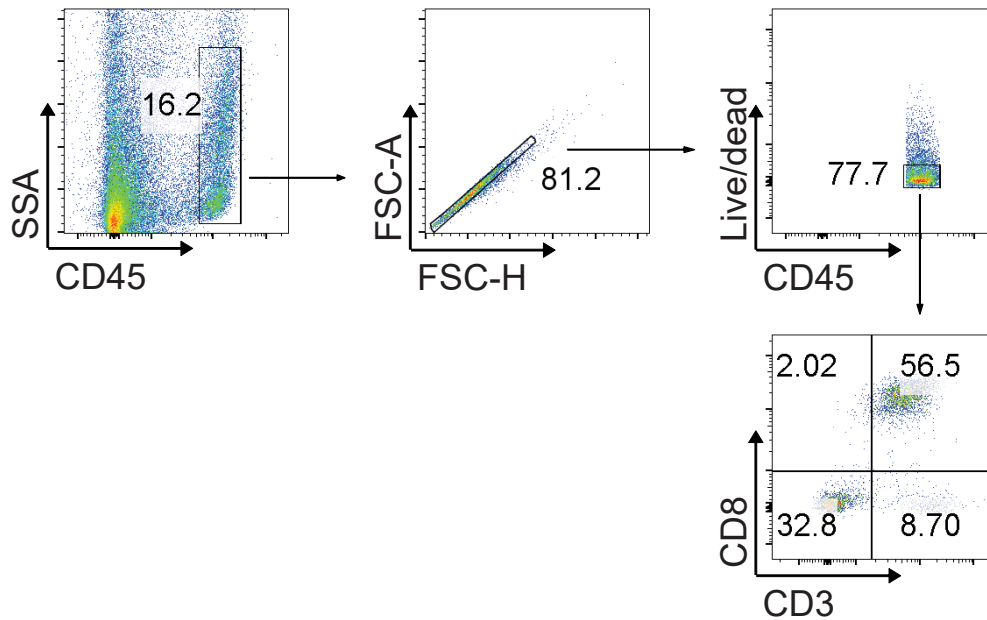

**Supplemental Figure 1. Gating strategies for flow cytometric analysis.** Single-cell suspensions of skin or lymphoid organs were prepared as described in the Methods. Leukocytes within the skin or lymphoid organs were gated as CD45<sup>+</sup>. Viable cell populations were gated based on forward and side scatters and by Fixable Blue staining. T cells were gated as CD45<sup>+</sup>CD3<sup>+</sup> and were further analyzed for the expression of indicated markers.

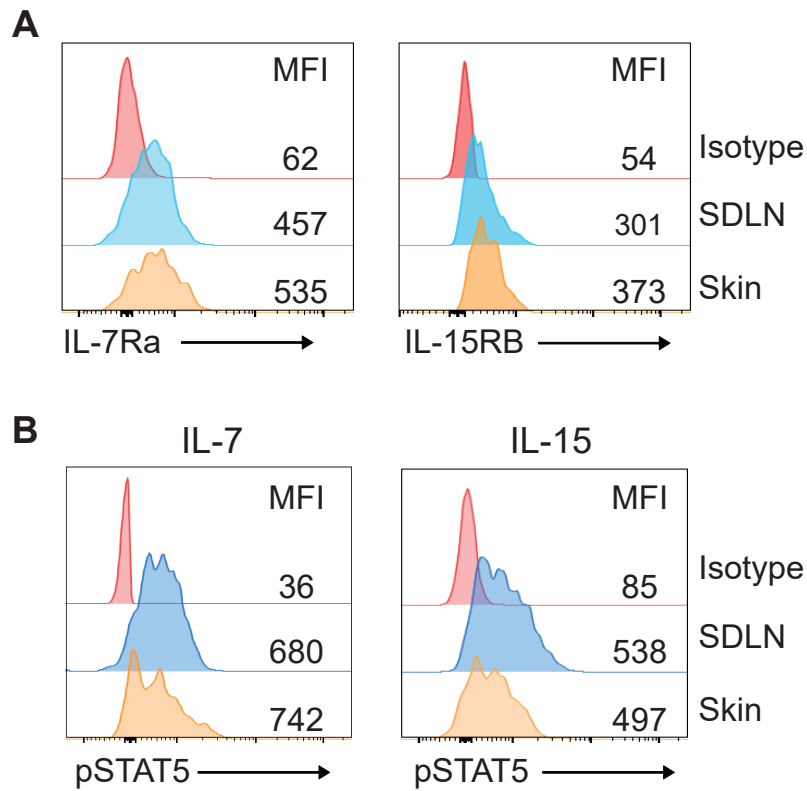

**Supplemental Figure 2. AA skin infiltrating CD8<sup>+</sup> T cells were responsive to  $\gamma$ c cytokine stimulation.** Expression of  $\gamma$ c cytokine receptors in AA lesional infiltrating T cells. **(A)** Flow cytometric analysis of IL-7Ra and IL-15RB expression by CD8<sup>+</sup> T cells within SDLN and skin from C3H/HeJ AA mice, presented as representative plots and mean fluorescence intensity (MFI). **(B)** Flow cytometric analysis of pSTAT5 expression in CD8<sup>+</sup> T cells within indicated tissues after treatment for 20 min with IL-7 (20 ng/mL) or IL-15 (20 ng/mL), presented as representative plots and mean fluorescence intensity (MFI) for pSTAT5 expression.

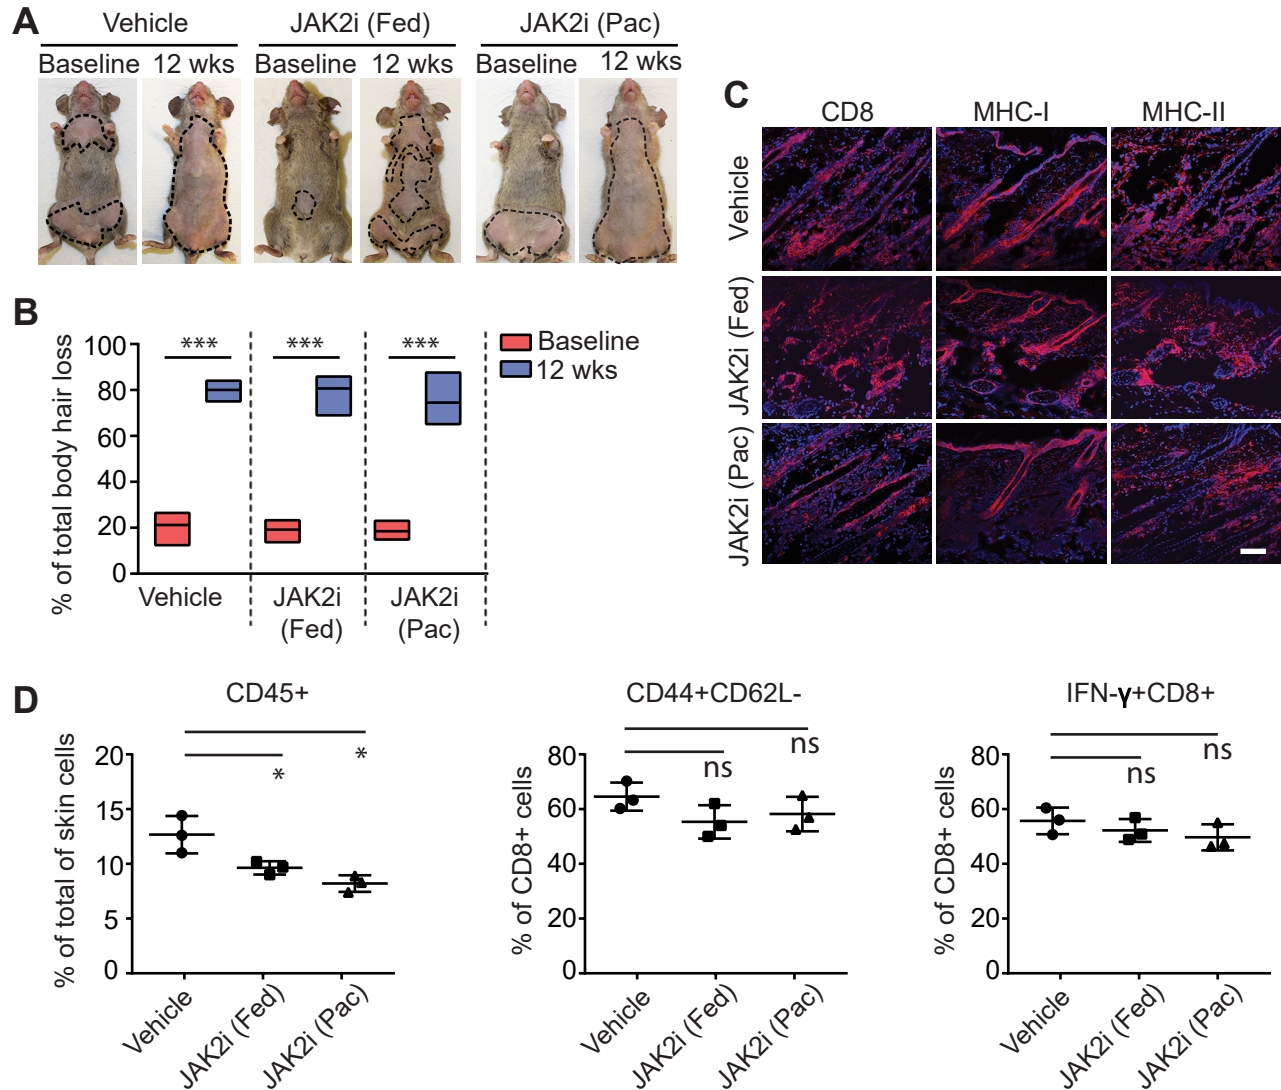

**Supplemental Figure 3. JAK2-selective inhibitor treatment failed to reverse AA, Related to Fig. 2.** Mice were treated as in Fig.2. Three C3H/HeJ AA mice per group were given Fedratinib (JAK2i (Fed)), Pacritinib (JAK2i (Pac)) or Vehicle at a dosage of 50mg/kg for 12 wks. **(A)** Representative images of individual JAK inhibitors or vehicle control-treated C3H mice before or after 12 weeks treatment. **(B)** Percentage of skin loss or regrowth were shown before and after treatment. \*\*\* $P < 0.001$  (Unpaired Student's t-test). **(C)** Representative immunofluorescence images of skin sections from JAK inhibitors or vehicle control-treated mice, stained with anti-CD8, anti-MHC-I, or anti-MHC-II mAbs. Dashed scale bars represent 100  $\mu\text{m}$ . **(D)** Percentages of skin infiltrating CD45<sup>+</sup> leukocytes, CD44<sup>+</sup>CD62L<sup>-</sup>CD8<sup>+</sup> T cells, as well as IFN- $\gamma$  producing CD8<sup>+</sup> T cells within the skin after treatment. ns indicates not significant, \* $P < 0.05$ , \*\*\* $P < 0.001$  (one-way ANOVA). Two replicate experiments were performed for a total 6 mice per group.

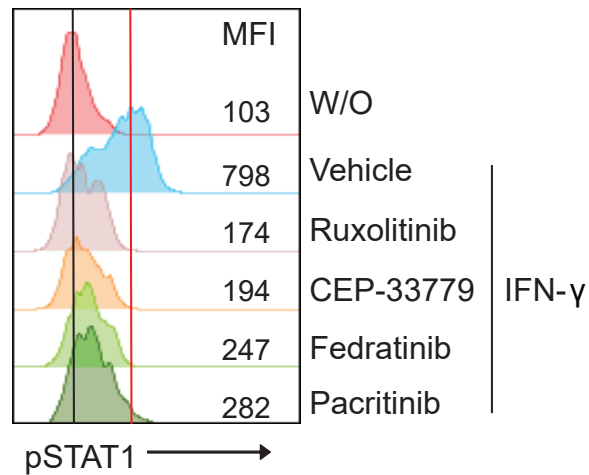

**Supplemental Figure 4. JAK2 selective inhibitors inhibit cytokine-induced JAK2 signaling in vivo, Related to Figure 2 and Supplementary Figure 3. JAK2 selective inhibitors inhibit cytokine-induced JAK2 signaling *in vivo*.** C3H/HeJ mice were administered by CEP-33779 (50 mg/kg), Fedratinib (50 mg/kg), Pacritinib (50 mg/kg), Ruxolitinib (30 mg/kg), or vehicle control through an ALZET osmotic pump for 7d. Peripheral blood was collected, stimulated with 50 ng/ml IFN- $\gamma$ , and analyzed by flow cytometry for pSTAT1.

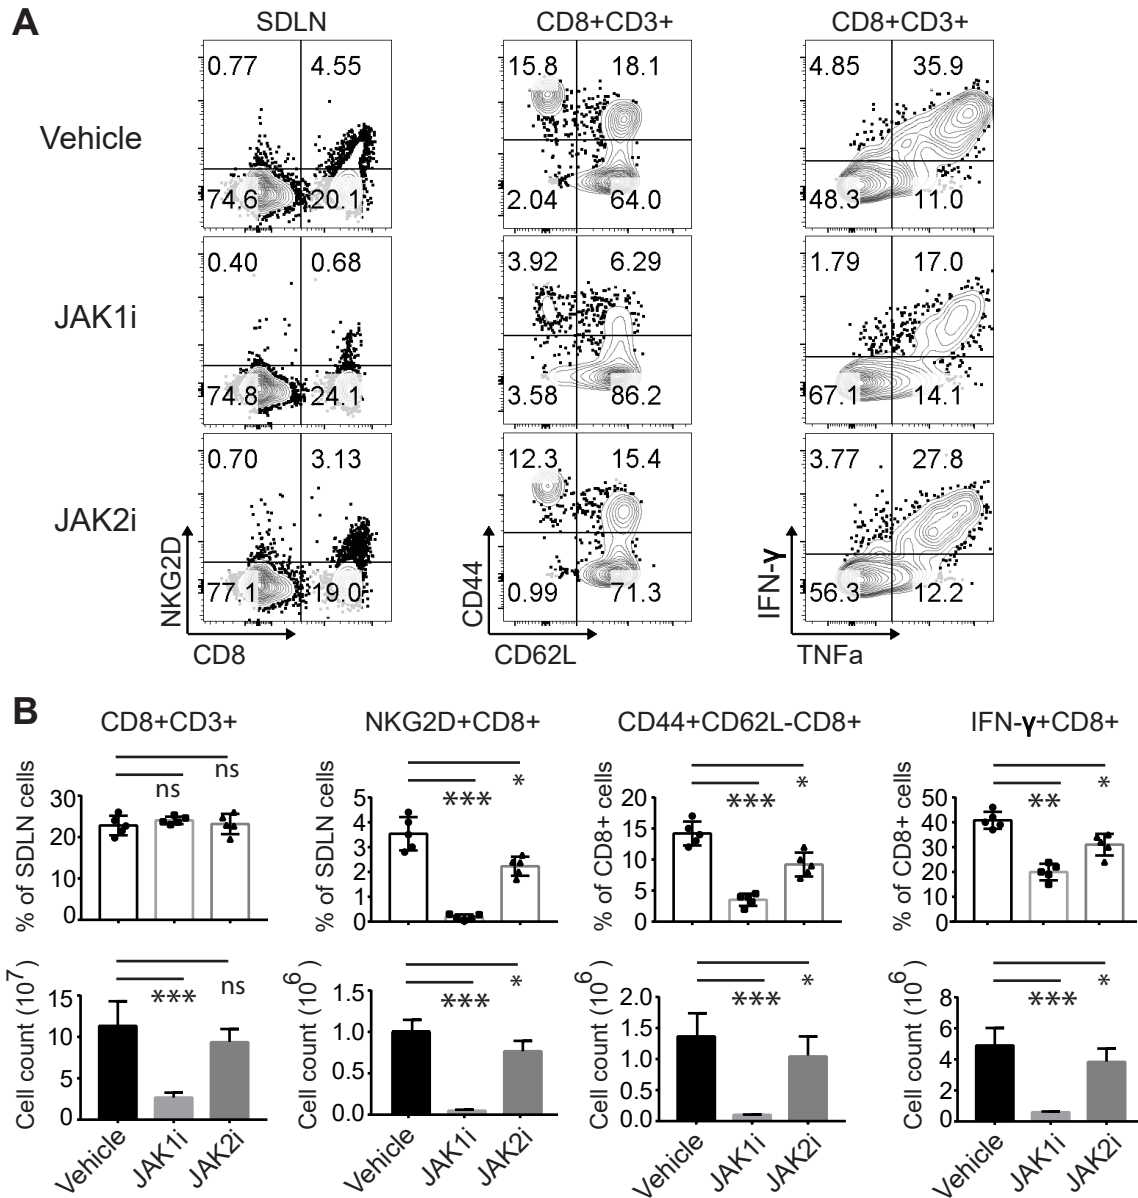

**Supplemental Figure 5. The effect of JAK1 or JAK2 blockade in peripheral lymphoid organs, Related to Figure 2.** Mice were treated as in Fig.4. (A) Representative flow cytometric plots analysis of expression of NKG2D, CD44 or CD62L on CD8<sup>+</sup> T cells and IFN- $\gamma$  producing CD8<sup>+</sup> T cells. (B) Summary graphs of the percentages and total numbers of CD8<sup>+</sup> T cells, CD44<sup>+</sup>CD62L<sup>-</sup>CD8<sup>+</sup> T cells, NKG2D<sup>+</sup>CD8<sup>+</sup> T cells, as well as IFN- $\gamma$  producing CD8<sup>+</sup> T cells within SDLN after treatment. n.s. indicates not significant, \*P < 0.05, \*\*P < 0.01, \*\*\*P < 0.001(one-way ANOVA). Two replicate experiments were performed for a total 10 mice per group.

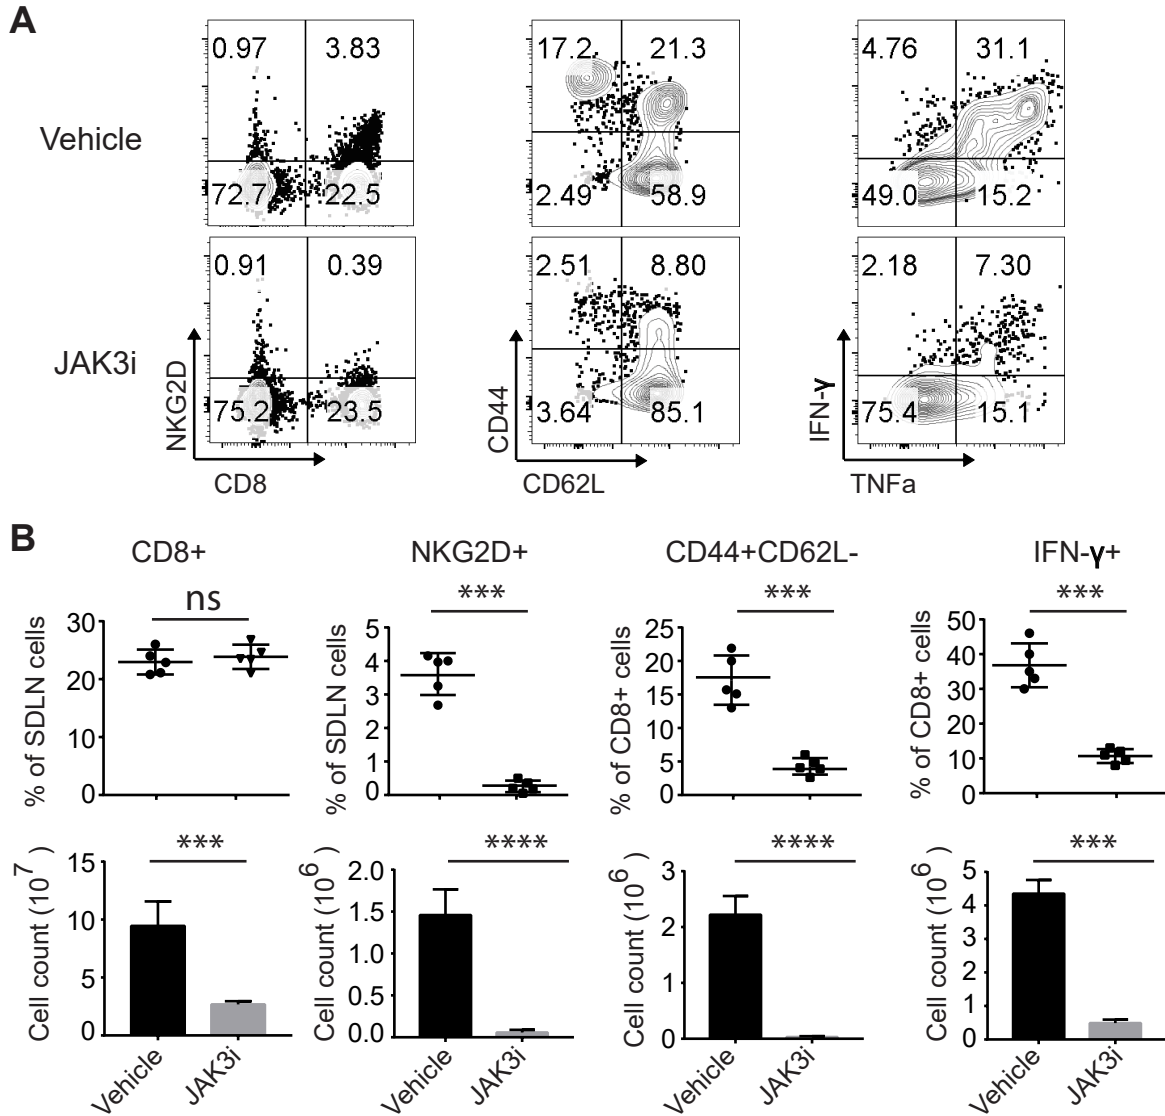

**Supplemental Figure 6. The effect of JAK3 blockade in peripheral lymphoid organs, Related to Figure 4.** Mice were treated as in Fig.3. **(A)** Representative flow cytometric plots analysis of expression of NKG2D, CD44 or CD62L on CD8<sup>+</sup> T cells and IFN- $\gamma$  producing CD8<sup>+</sup> T cells. **(B)** Summary graphs of the percentages and total numbers of CD8<sup>+</sup> T cells, CD44<sup>+</sup>CD62L<sup>-</sup> CD8<sup>+</sup> T cells, NKG2D<sup>+</sup>CD8<sup>+</sup> T cells, as well as IFN- $\gamma$  producing CD8<sup>+</sup> T cells within SDLN after treatment. n.s. indicates not significant, \*\*\*P < 0.001 (Unpaired Student's t-test). Two replicate experiments were performed for a total 10 mice per group.

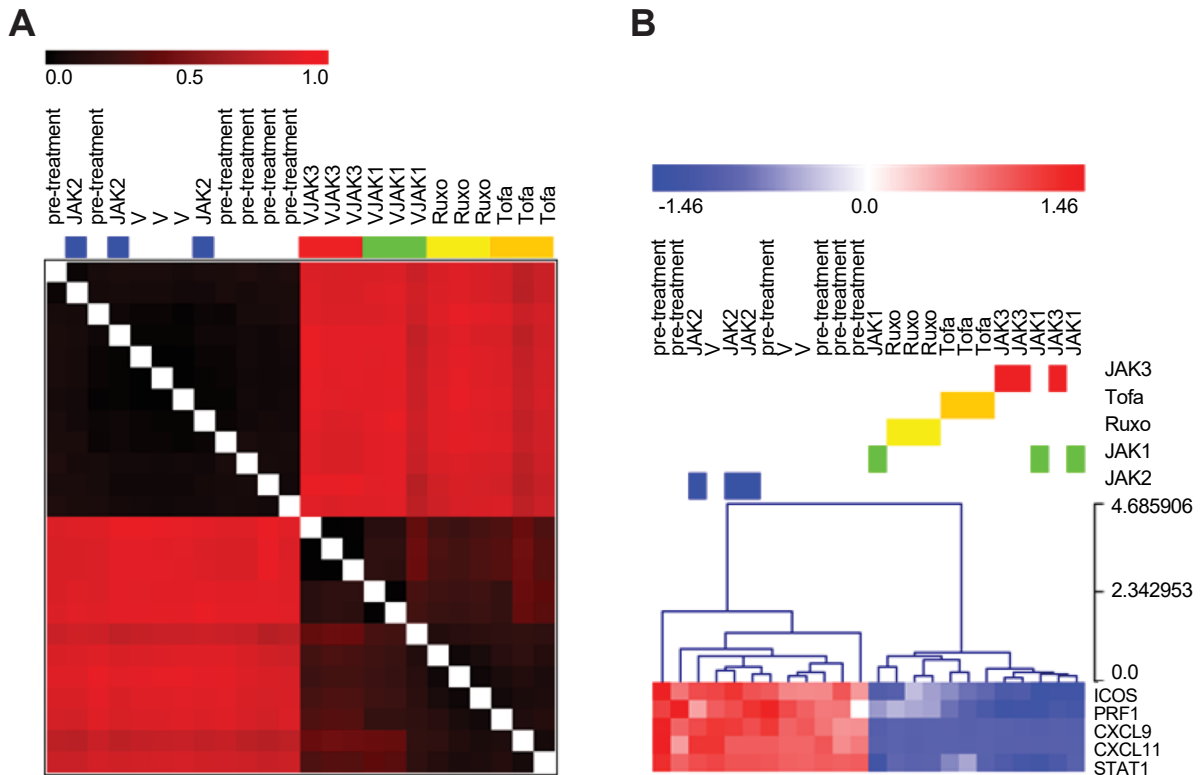

**Supplemental Figure 7. Molecular analysis of skin biopsies taken from JAKi treated mice. Related to Figure 2 and Figure 4.** Mice were treated as described in Fig.2 and Fig.4. (A) Clustering results of RNA-seq analysis expressed as an adjacency matrix. Stronger red indicates molecular similarity between sample pairs (row against column). (B) ALADIN CTL signature genes were investigated using RNA-seq, including ICOS, PRF1, CXCL9, CXCL11, and STAT1. The heat map indicates that JAK1i, JAK3i, ruxolitinib and tofacitinib (blue shaded area) suppressed the ALADIN CTL signature, compared to JAK2i, and vehicle and pretreatment controls, where expression remained high (red shaded area). Abbreviation: V, Vehicle; JAK1, INCB039110; JAK2, CEP-33779; JAK3, PF-06651600; Ruxo, ruxolitinib; Tofa, tofacitinib.



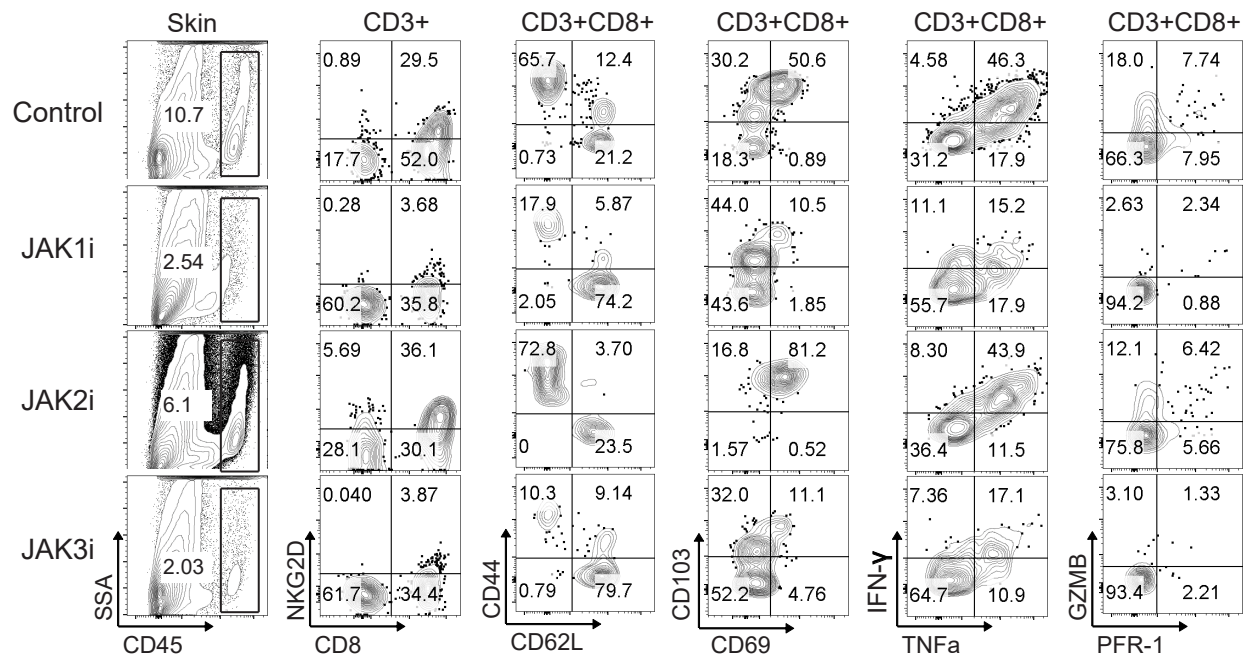

**Supplemental Figure 8. Topical JAK-selective inhibitor treatment alters T cell activation in skin, Related to Figure 6.** Mice were treated as in Fig. 6. Representative flow cytometric plots showing the frequencies of CD45<sup>+</sup> leukocytes, CD8<sup>+</sup> T cells, CD103<sup>+</sup>CD69<sup>+</sup>CD8<sup>+</sup> T cells, CD44<sup>+</sup>CD62L<sup>-</sup>CD8<sup>+</sup> T cells, IFN- $\gamma$  producing CD8<sup>+</sup> T cells, GZMB and PRF1 producing CD8<sup>+</sup> T within the skin after JAK inhibitors treatment.

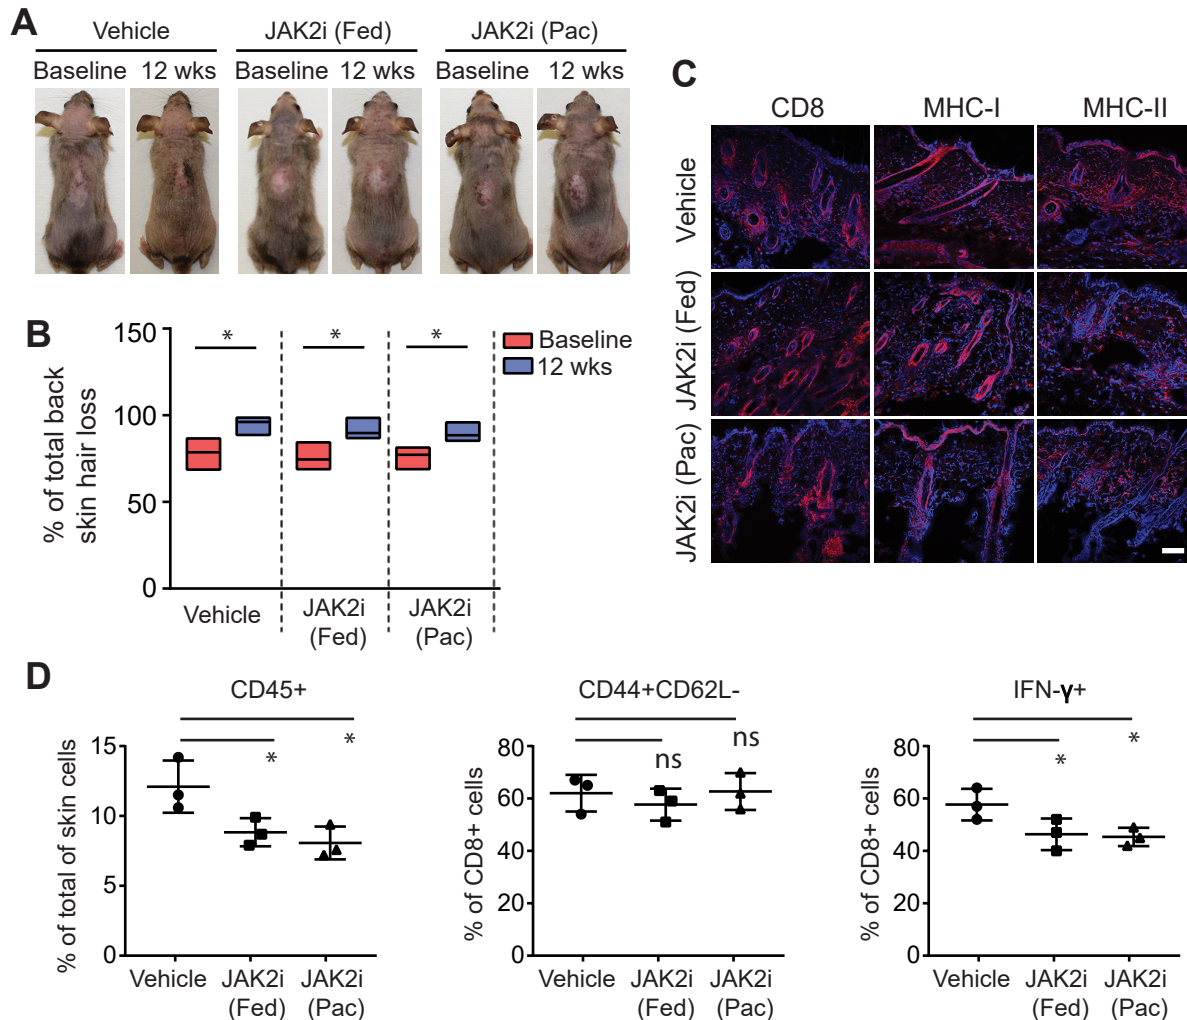

**Supplemental Figure 9. Topical JAK2-selective inhibitor treatment failed to induce hair growth in C3H/HeJ mice with AA, Related to Fig. 6.** Mice were treated as in Fig. 6. Three long standing C3H/HeJ AA mice per group were topically applied with Fedratinib (JAK2i), Pacritinib (JAK2i) or vehicle control daily for 12 wks. **(A)** Representative images of individual JAK inhibitors or vehicle control-treated C3H/HeJ mice before or after 12 weeks treatment. **(B)** Percentage of skin dorsal skin hair loss or regrowth were shown before and after treatment. \* $P < 0.05$  (Unpaired Student's t-test). **(C)** Representative immunofluorescence images of skin sections from JAK inhibitors or vehicle control-treated mice, stained with anti-CD8, anti-MHC-I, or anti-MHC-II mAbs. Dashed scale bars represent 100  $\mu\text{m}$ . **(D)** Percentages of skin infiltrating CD45<sup>+</sup> leukocytes, CD44<sup>+</sup>CD62L<sup>-</sup>CD8<sup>+</sup> T cells, as well as IFN- $\gamma$  producing CD8<sup>+</sup> T cells within the skin after JAK inhibitors treatment. ns indicates not significant, \* $P < 0.05$  (one-way ANOVA). Two replicate experiments were performed for a total 6 mice per group.

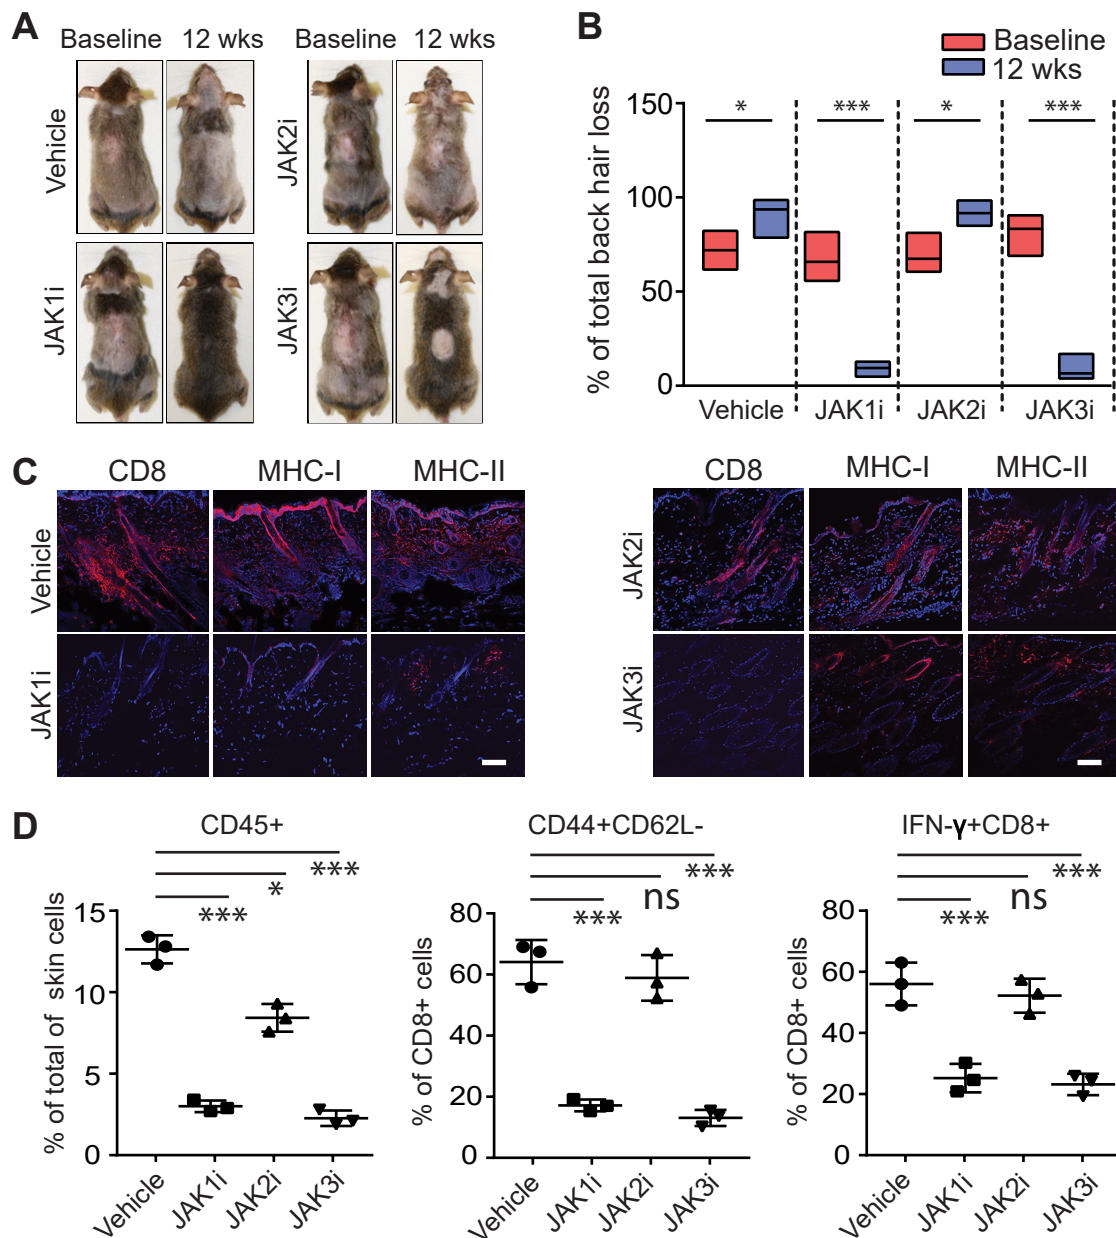

**Supplemental Figure 10. Topical JAK1-selective or JAK3-selective inhibitor treatment induced hair growth in C3H/HeJ mice with AA, Related to Fig. 6.** Mice were treated as in Fig. 6. Three long standing C3H/HeJ AA mice per group were topically applied with GLPG0634 (JAK1i), AZD1480 (JAK2i), and VX-509 (JAK3i) or vehicle control daily for 12 wks. **(A)** Representative images of individual JAK inhibitors or vehicle control-treated C3H mice before or after 12 weeks treatment. **(B)** Percentage of dorsal skin hair loss or regrowth were shown before and after treatment. \* $P < 0.05$ , \*\*\* $P < 0.001$  (Unpaired Student's t-test). **(C)** Representative immunofluorescence images of skin sections from JAK inhibitors or vehicle control-treated mice, stained with anti-CD8, anti-MHC-I, or anti-MHC-II mAbs. Dashed scale bars represent 100  $\mu\text{m}$ . **(D)** Percentages of skin infiltrating CD45<sup>+</sup> leukocytes, CD44<sup>+</sup>CD62L<sup>-</sup>CD8<sup>+</sup> T cells, as well as IFN- $\gamma$  producing CD8<sup>+</sup> T cells within the skin after JAK inhibitors treatment. ns indicates not significant, \* $P < 0.05$ , \*\*\* $P < 0.001$  (one-way ANOVA). Two replicate experiments were performed for a total 6 mice per group.

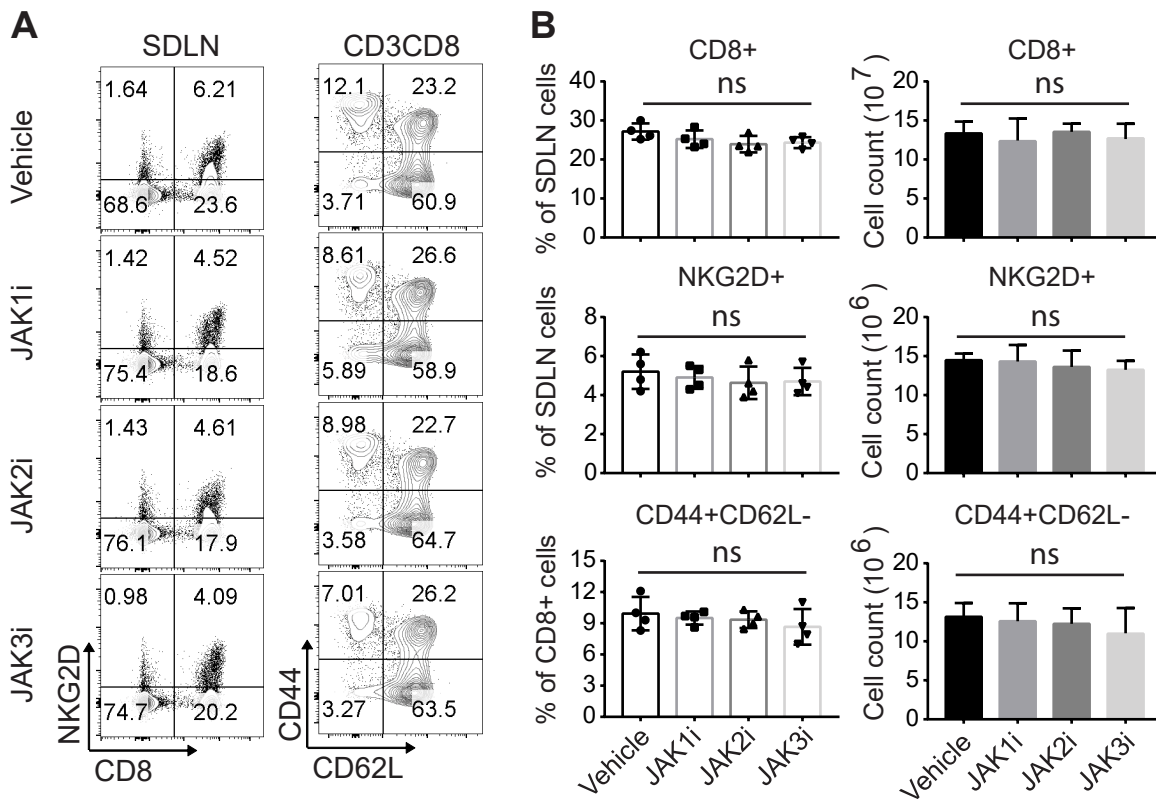

**Supplemental Figure 11. Topical JAK-selective inhibitor treatment had no significant effect on T cell activation in peripheral lymphoid organs, Related to Fig. 6.** Mice were treated as in Fig. 6. **(A)** Representative flow cytometric plots showing the expression of NKG2D, CD44 and CD62L on CD8<sup>+</sup> T cells within SDLNs after treatment. **(B)** Summary graphs of the percentages and total numbers of CD8<sup>+</sup> T cells, CD44<sup>+</sup>CD62L<sup>-</sup>CD8<sup>+</sup> T cells as well as NKG2D<sup>+</sup>CD8<sup>+</sup> T cells within the SDLN after JAK inhibitors treatment. ns indicates not significant (one-way ANOVA).

**Supplemental Table 1. Kinase selectivity profile of the JAK inhibitors used in this study in cell-free assays.**

| Drug             | Target             |                    |                    |                    |
|------------------|--------------------|--------------------|--------------------|--------------------|
|                  | JAK1<br>IC50 (nM)) | JAK2<br>IC50 (nM)) | JAK3<br>IC50 (nM)) | TYK2<br>IC50 (nM)) |
| INCB03911 (1)    | 2                  | 63                 | 2000               | 795                |
| Filgotinib (2)   | 10                 | 28                 | 810                | 116                |
| CEP33779 (3)     | 72                 | 1.8                | 85                 | 1400               |
| Fedratinib (4)   | 105                | 3                  | 1002               | 405                |
| Pacritinib (5)   | 1280               | 23                 | 520                | 50                 |
| AZD1480 (6)      | 1.3                | < 0.4              | 3.9                | N/D                |
| PF-06651600 (7)  | >10000             | >10000             | 33.1               | >10000             |
| Decernotinib (8) | 11                 | 13                 | 2.5                | 11                 |
| Ruxolitinib (9)  | 3.3                | 2.8                | 428                | 19                 |
| Tofacitinib (10) | 15.1               | 77.4               | 55.0               | 489.0              |

## References

1. Kettle JG, Astrand A, Catley M, Grimster NP, Nilsson M, Su Q, et al. Inhibitors of JAK-family kinases: an update on the patent literature 2013-2015, part 2. *Expert Opin Ther Pat.* 2017;27(2):145-61.
2. Van Rompaey L, Galien R, van der Aar EM, Clement-Lacroix P, Nelles L, Smets B, et al. Preclinical characterization of GLPG0634, a selective inhibitor of JAK1, for the treatment of inflammatory diseases. *J Immunol.* 2013;191(7):3568-77.
3. Stump KL, Lu LD, Dobrzanski P, Serdikoff C, Gingrich DE, Dugan BJ, et al. A highly selective, orally active inhibitor of Janus kinase 2, CEP-33779, ablates disease in two mouse models of rheumatoid arthritis. *Arthrit Res Ther.* 2011;13(2):R68.
4. Wernig G, Kharas MG, Okabe R, Moore SA, Leeman DS, Cullen DE, et al. Efficacy of TG101348, a selective JAK2 inhibitor, in treatment of a murine model of JAK2V617F-induced polycythemia vera. *Cancer Cell.* 2008;13(4):311-20.
5. Hart S, Goh KC, Novotny-Diermayr V, Hu CY, Hentze H, Tan YC, et al. SB1518, a novel macrocyclic pyrimidine-based JAK2 inhibitor for the treatment of myeloid and lymphoid malignancies. *Leukemia.* 2011;25(11):1751-9.
6. Hedvat M, Huszar D, Herrmann A, Gozgit JM, Schroeder A, Sheehy A, et al. The JAK2 inhibitor AZD1480 potently blocks Stat3 signaling and oncogenesis in solid tumors. *Cancer Cell.* 2009;16(6):487-97.
7. Telliez JB, Dowty ME, Wang L, Jussif J, Lin T, Li L, et al. Discovery of a JAK3-Selective Inhibitor: Functional Differentiation of JAK3-Selective Inhibition over pan-JAK or JAK1-Selective Inhibition. *ACS Chem Biol.* 2016;11(12):3442-51.
8. Mahajan S, Hogan JK, Shlyakhter D, Oh L, Salituro FG, Farmer L, et al. VX-509 (decernotinib) is a potent and selective janus kinase 3 inhibitor that attenuates inflammation in animal models of autoimmune disease. *J Pharmacol Exp Ther.* 2015;353(2):405-14.
9. Quintas-Cardama A, Vaddi K, Liu P, Manshour T, Li J, Scherle PA, et al. Preclinical characterization of the selective JAK1/2 inhibitor INCB018424: therapeutic implications for the treatment of myeloproliferative neoplasms. *Blood.* 2010;115(15):3109-17.
10. Flanagan ME, Blumenkopf TA, Brissette WH, Brown MF, Casavant JM, Shang-Poa C, et al. Discovery of CP-690,550: a potent and selective Janus kinase (JAK) inhibitor for the treatment of autoimmune diseases and organ transplant rejection. *J Med Chem.* 2010;53(24):8468-84.

**Supplemental Table 2. Antibodies used for Flow Cytometry.**

| Antibody-Conjugate         | Company (clone)                    | Catalog Number | Dilution |
|----------------------------|------------------------------------|----------------|----------|
| CD3-PerCP-eFluor 710       | Thermo Fisher Scientific (17A2)    | 46-0032-82     | 1:100    |
| CD4-BUV496                 | BD Bioscience (GK1.5)              | 612952         | 1:100    |
| CD4-BV711                  | BD Bioscience (GK1.5)              | 563050         | 1:200    |
| CD8-BUV395                 | BD Bioscience (53-6.7)             | 563786         | 1:200    |
| CD8-PE/Cyanine7            | Biolegend (53-6.7)                 | 100722         | 1:200    |
| CD11b-APC                  | Biolegend (M1/70)                  | 101212         | 1:200    |
| CD19-PE/Dazzle 594         | Biolegend (6D5)                    | 115554         | 1:200    |
| CD25-BV650                 | Biolegend (PC61)                   | 102038         | 1:200    |
| CD44-FITC                  | BD Bioscience (IM7)                | 553133         | 1:100    |
| CD45-Alexa Fluor 700       | Biolegend (30-F11)                 | 103128         | 1:200    |
| CD45-APC/Cyanine7          | Biolegend (30-F11)                 | 103116         | 1:200    |
| CD49a-Alexa Fluor 647      | BD Bioscience (Ha31/8)             | 562113         | 1:200    |
| CD62L-APC-R700             | BD Bioscience (MEL-14)             | 565159         | 1:200    |
| CD69-BV785                 | Biolegend (H1.2F3)                 | 104543         | 1:200    |
| CD103-BV421                | Biolegend (2E7)                    | 121422         | 1:200    |
| CD122-APC                  | Biolegend (TM- $\beta$ 1)          | 123214         | 1:200    |
| CD127-BV421                | Biolegend (A7R34)                  | 135027         | 1:200    |
| NKG2D-PE                   | Biolegend (CX5)                    | 130208         | 1:100    |
| GZMB-FITC                  | Biolegend (GB11)                   | 515403         | 1:50     |
| PRF1-APC                   | Biolegend (S16009A)                | 154304         | 1:200    |
| Ki67-eFluor 450            | Thermo Fisher Scientific (SolA15)  | 48-5698-82     | 1:100    |
| FoxP3-PE-eFluor 610        | Thermo Fisher Scientific (FJK-16s) | 61-5773-82     | 1:200    |
| IFN- $\gamma$ -FITC        | Biolegend (XMG1.2)                 | 505806         | 1:100    |
| TNF- $\alpha$ -PE/Cyanine7 | Biolegend (MP6-XT22)               | 506324         | 1:200    |
| Phospho-Stat1-PE           | Cell Signaling Technology (D4A7)   | 25809S         | 1:50     |
| Phospho-Stat3-PE           | Cell Signaling Technology (D3A7)   | 8119S          | 1:50     |
| Phospho-Stat5-PE           | Cell Signaling Technology (C71E5)  | 5387S          | 1:50     |

### Supplemental Table 3

| <b>jak1</b> | <b>jak2</b> | <b>jak3</b>   |
|-------------|-------------|---------------|
| Slc2a9      |             | 0610012G03Rik |
| Cd69        |             | Zcchc2        |
| Ifit1       |             | Bcat2         |
| Rprd1b      |             | A930005H10Rik |
| Oas1g       |             | Sdr42e1       |
| Rnf213      |             | Egr1          |
| Ifi44       |             | 1500011K16Rik |
| Gm10648     |             | Mctp2         |
| Ogfr        |             | Myo5b         |
| Gm4951      |             | Cxadr         |
| Dhrs9       |             | Slc10a6       |
| Ceacam12    |             | Rarres2       |
| Mkl1        |             | Atp5c1        |
| Slfn9       |             | Prdm1         |
| lars2       |             | Sorbs3        |
| Parp9       |             | Irgm1         |
| Parp14      |             | Kmt5a         |
| Pinlyp      |             | Trim56        |
| Pmepa1      |             | Arl5a         |
| Slc39a2     |             | Map2k4        |
| Aasdh       |             | Erp44         |
| Erap1       |             | Ap1s3         |
| Xaf1        |             | Tsc22d2       |
| Oas1a       |             | Adam10        |
| Slc25a13    |             | Commd3        |
| Plekhb1     |             | Cldn5         |
| Dnajb4      |             | Chchd3        |
| Ubxn11      |             | Adgrf2        |
| Aebp2       |             | Cdsn          |
| Il4ra       |             | Tmprss4       |
| Creld1      |             | Rps6ka5       |
| Cd55        |             | Dmkn          |
| Ccdc88b     |             | Tmtc3         |
| AW112010    |             | Itpkb         |
| Stat2       |             | Stat3         |

|          |          |
|----------|----------|
| Trim21   | Rcbtb1   |
| Smox     | Sorcs2   |
| Slfn2    | Ifih1    |
| Tnfrsf14 | Ivl      |
| Cxcl16   | Carmil1  |
| Pitpnm1  | Ap1m2    |
| Pccb     | Ttc22    |
| Oasl2    | Map3k9   |
| Zfp383   | Runx3    |
| Ehf      | Prf1     |
| Igsf3    | Ppfia3   |
| Coro2a   | Spry2    |
| Wnt11    | Rassf10  |
| Oas2     | Luzp1    |
| Gbp3     | Zfp763   |
| Ccdc62   | Mical2   |
| Padi4    | Cygb     |
| Asb2     | Bvht     |
| H2-T24   | Cpeb1    |
| Ifih1    | Ubxn11   |
| Pqlc1    | Arl15    |
| Aif1     | Srpk1    |
| Kansl1l  | Dsp      |
| Teddm3   | Lipm     |
| Carmn    | Fut1     |
| Krtap4-9 | Adar     |
| Ddx24    | Mfhas1   |
| C4a      | Igsf9    |
| Cdh13    | Blzf1    |
| Phf11b   | Phip     |
| B4galnt1 | Fhl2     |
| Efhd2    | Sesn2    |
| Porcn    | Ptprf    |
| Adam1a   | Cdc42ep3 |
| Car9     | Gpsm1    |
| Capg     | Lsr      |
| H2-Q1    | Ndufs6   |
| Samd5    | Upf3b    |
| H2-T22   | Rab27b   |
| Psme1    | Zfp606   |
| Helz2    | Psmb10   |



|            |          |
|------------|----------|
| Itgb2      | Grhl1    |
| Styk1      | Ppfia1   |
| St6galnac2 | Uqcc1    |
| Uba7       | Ndufa13  |
| H2-BI      | Sh3tc1   |
| Rtp4       | Esrp1    |
| Il2rb      | Plcx2    |
| Eno1       | Parp9    |
| Fnip1      | Trim59   |
| Trappc9    | Jup      |
| Cdc42ep3   | Ankrd22  |
| Serpib1a   | Cyp4f39  |
| 2-Mar      | Cdcp1    |
| Casp3      | Crtc2    |
| Trim34b    | Serpib6a |
| Mtus1      | Sec24c   |
| Lgals4     | Larp4b   |
| Ndufa4l2   | Arhgef5  |
| BC067074   | Rassf5   |
| Mill1      | Tinf2    |
| Acp6       | Aak1     |
| Tmem268    | Trip12   |
| Pfkl       | Ndufa1   |
| Mir142     | Acpp     |
| Scmh1      | Pdlim2   |
| Kdm5a      | Dlg3     |
| Slc2a12    | Pla2g4f  |
| Gpaa1      | Fcho1    |
| Csf3r      | Hip1r    |
| Slc2a1     | Ndufb11  |
| Nlrc5      | Daam1    |
| H2-K2      | Eml4     |
| Stil       | Klf3     |
| Plbd1      | Ndufb5   |
| Flt1       | Tuft1    |
| Piezo1     | Kat6a    |
|            | Ak4      |
|            | Fam83h   |
|            | Esrp2    |
|            | Celsr2   |
|            | Mill1    |

Dedd2  
Ptk6  
Gpr87  
Carmn  
Afap1l2  
Kdm5c  
Aldh3b3  
Unc119  
Plxnb2  
Sec31a  
Zfp266  
Tango2  
Arhgef37  
Gtpbp3  
Grb7  
Defb1  
Zdhhc9  
Zfp169  
Hint2  
Clndnd1  
Mtfr1  
Ndufa5  
Rangap1  
Baz2a  
Npepl1  
Csnk1a1  
Klhl25  
Pof1b  
Arih1  
Arhgap18  
Fmc1  
Usp34  
Ano7  
Unc45a  
Slc9a8  
Sbno1  
Sptbn2  
Plppr3  
Gale  
Kdm5b  
Ddrgk1

Ceacam1  
Pkn1  
Ocln  
Serpib12  
Pex16  
Csnk2a2  
Sema4a  
Bicd2  
Mpzl2  
Zbtb1  
Hspa1b  
Nqo2  
Emcn  
Htra3  
Rhbf2  
Styk1  
Usp38  
Pcyox1  
Psmb9  
Ankrd35  
Zcchc6  
Dsg1a  
Mid2  
Gpx4  
Plcl2  
Nedd9  
Hebp1  
Rpl3l  
Ankrd17  
Xpnpep1

4-Sep

Ghitm  
Zfand6  
Scyl2  
Elac1  
Fam83g  
Ifit1  
Wipf2  
Ctnnd1  
Lrrc28  
Ralgapb

Ep300  
Gne  
Pfkp  
Nit2  
Nectin4  
Ubr5  
Lypd3  
Epha4  
Gm10336  
Ece1  
Hectd1  
Bicd12  
Stk26  
Pkp3  
Hook1  
N4bp2  
Grasp  
Atg10  
1110051M20Rik  
Preid1  
Trim21  
Gapvd1  
Cast  
Capn10  
B4galnt4  
Yod1  
Eno1b  
Samd10  
Actr8  
Shroom3  
Fbrs  
H60c  
Fut2  
Epha1  
Ppp4r3b  
Bola3  
Aldh9a1  
Il4ra  
Rhbd12  
Gatc  
Tbc1d14

Bst1  
Asb14  
Dpm3  
Gm13710  
Lrrc8e  
Pou6f1  
Foxo3  
Cdpf1  
Adgrg7  
Alox12  
Upf1  
Traf6  
Zcrb1  
Zmiz1  
Gpr34  
Slc25a19  
Gipc1  
Gstp2  
Cox7b  
Camsap2  
Rad52  
Col18a1  
Oaz1-ps  
Dmap1  
Ppp6r3  
Tmem45a  
Pomgnt2  
Eid2b  
Cnot1  
Jag1  
Smim10l1  
Ttc39b  
Wdr26  
Helz2  
Mib1  
Piwil2  
Stat1  
Slurp1  
Pik3cd  
Gpaa1  
Efnb2

Bnc1  
Atp11a  
Fbxw11  
Mgat4a  
Iffo1  
Fbxw2  
Tcea3  
Cers4  
Prkaa2  
Ppp1r1a  
Strn  
Ii1rn  
Pmepa1  
Washc1  
Aebp2  
Fam210b  
Abcb4  
Peli1  
Gcsh  
Yjefn3  
Cnpy3  
Efl1  
Fam83b  
Cisd3  
Tfg  
Mab21l3  
Dnajc27  
Cd244  
Liph  
Erc1  
Pqlc1  
Cited4  
Golga1  
Ehbp1  
Rhbg  
Cds2  
Myo6  
Csrnp1  
Adam1a  
Col11a2  
Asb11

Sh3bp5l  
Cx3cr1  
Ttc33  
Gm8909  
Rilpl1  
Dsc3  
Pdgfc  
Kcnn1  
Nlrc5  
Zfp92

3-Mar

Ephb3  
Crot  
Hnrnpul2  
Mkl  
Rassf3  
Rwdd3  
Gjb3  
Snn  
Aadacl2  
Zadh2  
Serinc5  
Pml  
Cyth1  
Def8  
Dhcr7  
Slc9a3r2  
Ube2d-ps  
Itsn2  
Serpib5  
Bcap31  
Sh3gl1  
Tmem154  
Nkpd1  
Acyp2
